# Supplementary material
Source: PubMed Central journal article supplement (PMC4429721)
Supplement: supp_mol.114.097030_Supplemental_97030.pdf [file supp_mol.114.097030_Supplemental_97030.pdf]

Supplementary data file

Article's title: Investigation of the fate of type I angiotensin receptor after biased activation

Authors: Gyöngyi Szakadáti, András D. Tóth, Ilona Oláh, László Sándor Erdélyi, Tamas Balla, Péter Várnai, László Hunyady, András Balla

Department of Physiology (G.S., A.D.T., I.O., L.S.E., P.V., L.H. A.B.), Semmelweis University, Faculty of Medicine, H-1444 Budapest, Hungary

MTA-SE Laboratory of Molecular Physiology (L.S.E., P.V., L.H. A.B.), Hungarian Academy of Sciences and Semmelweis University, H-1094 Budapest, H-1094 Budapest, Hungary

Section on Molecular Signal Transduction (T.B.), Program for Developmental Neuroscience, Eunice Kennedy Shriver National Institute of Child Health and Human Development, National Institutes of Health, Bethesda, MD 20892

Running title: Fate of biased activated AT<sub>1</sub>-receptor

## Supplemental Figure 1.

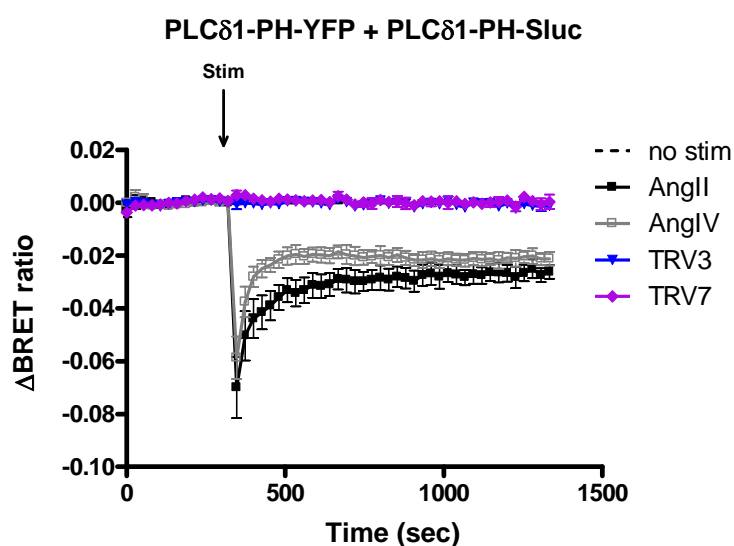

**Supplemental Figure 1. Effects of AT<sub>1</sub>-R agonist stimulation on PtdIns(4,5)P<sub>2</sub> breakdown in HEK293 cells.** HEK293 cells were transfected with the plasmids of the AT<sub>1</sub>-R, PLC $\delta$ 1-PH-YFP and PLC $\delta$ 1-PH-Sluc, and after 24 hours the cells were exposed to either 100 nM AngII (black trace), 1  $\mu$ M TRV120023 (labeled as TRV3, blue trace), 1  $\mu$ M TRV120027 (labeled as TRV7, purple trace), 10  $\mu$ M AngIV (grey trace), or vehicle (dashed lines) at the indicated time point. The BRET records are average of 3 independent experiments. Mean values  $\pm$  SEM are shown (n = 3).

## Supplemental Figure 2.

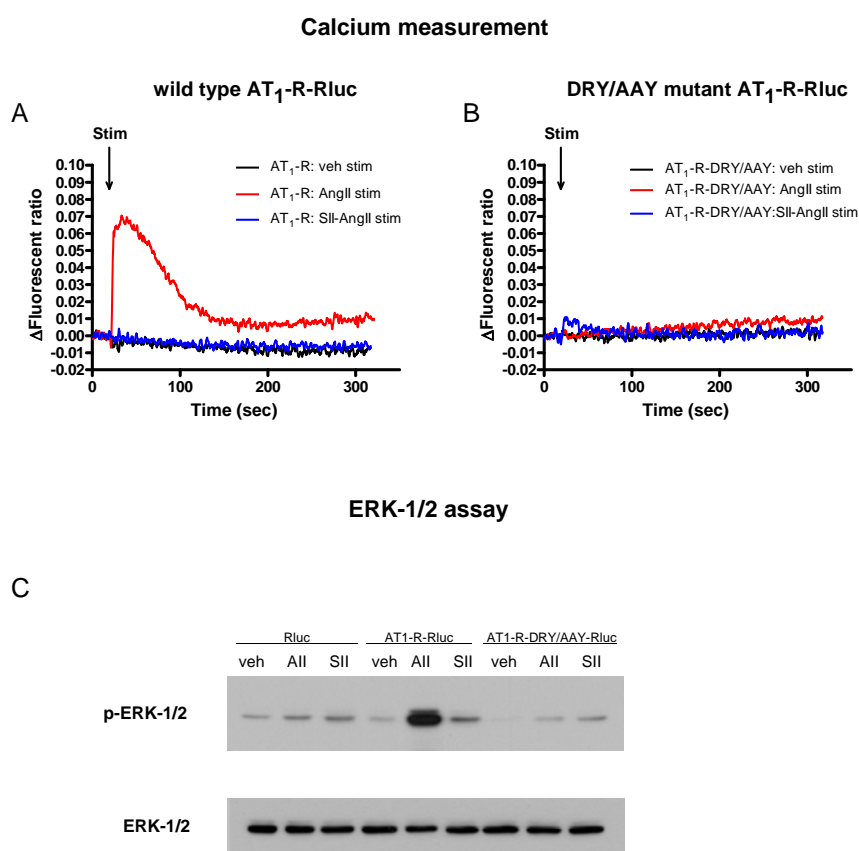**Supplemental Figure 2. Functional analysis of the AT<sub>1</sub>-R-Rluc and AT<sub>1</sub>-R-DRY/AAY-Rluc.**

HEK293 cells were transfected with the plasmids of the indicated AT<sub>1</sub>-R-luciferase (wild type or DRY/AAY mutant), and after 24 hours the cells were used for studies. (A-B) Cytoplasmic Ca<sup>2+</sup> measurement. The Fura-2-loaded HEK293 cells were exposed to either 100 nM AngII (red trace), 10 μM SII-AngII (blue trace), or vehicle (black trace) at the indicated time points. The curves are representative of 3 independent experiments. (C) ERK-1/2 MAPK activation. HEK293 cells were exposed to vehicle, 100 nM AngII or 10 μM SII-AngII for 5 min. The western blot is a representative of 3 independent experiments.

## Supplemental Figure 3.

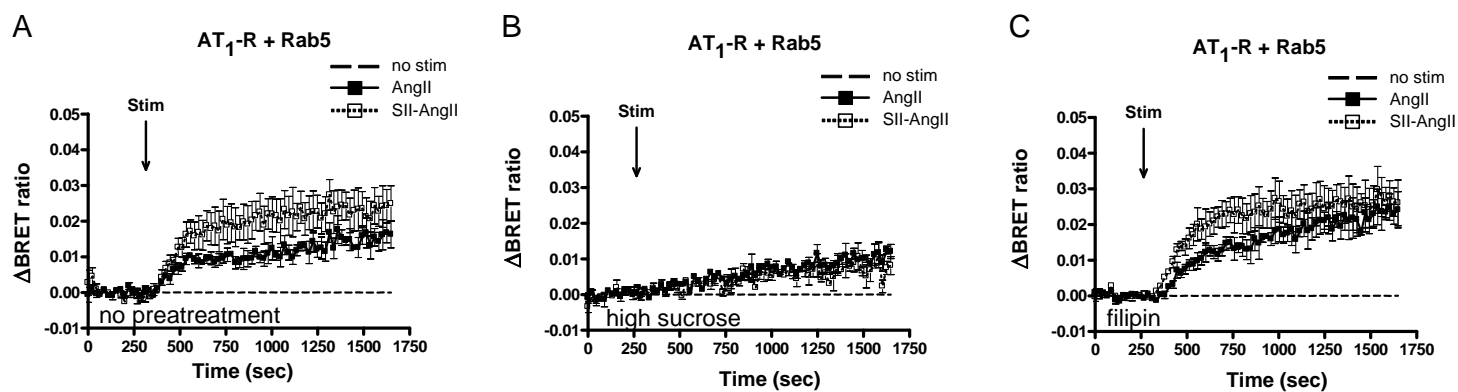

**Supplemental Figure 3. BRET assay between AT<sub>1</sub>-R and Rab5 upon either AngII or SII-AngII stimulation in HEK293 cells.** HEK293 cells were transfected with the plasmids of the AT<sub>1</sub>-R-Rluc and with Rab5-YFP proteins, and after 24 hours the experiments were carried out. Cells were pretreated for 30 min with vehicle BRET medium (A), BRET medium supplemented with 300 mM sucrose (B), or 5  $\mu$ g/ml filipin (C) and exposed to either vehicle (dashed line) or 100 nM AngII (black filled symbols) or 10  $\mu$ M SII-AngII (grey open symbols) at the indicated time points. The BRET curves are average of 3 independent experiments, each performed in triplicates. Mean values  $\pm$  SEM are shown (n = 3).

## Supplemental Figure 4.

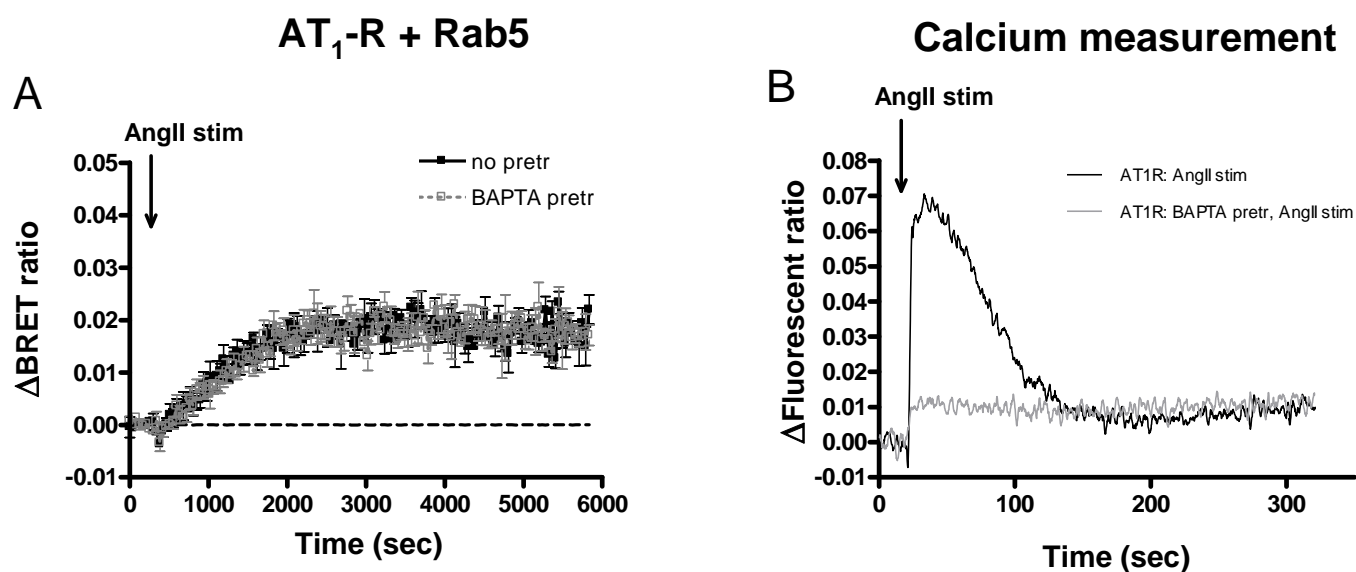

**Supplemental Figure 4. Effect of intracellular Ca<sup>2+</sup> chelation on AT<sub>1</sub>-R internalization upon AngII stimulation in HEK293 cells.** HEK293 cells were transfected with the plasmids of the AT<sub>1</sub>-R-Rluc and with either Rab5-YFP (A) or PLCδ1-PH-YFP (C), and after 24 hours the cells were pretreated for 30 min with either vehicle BRET medium (black traces) or BRET medium supplemented with 10 μM BAPTA-AM for 30-45 min (grey traces) and exposed to either vehicle (dashed line, A and B) or 100 nM AngII (A-C) or 10 μM ionomycin (C) at the indicated time points. The BRET curves (A and C) are average of 3 independent experiments, each performed in triplicates, mean values ± SEM are shown (n = 3); the fluorescent ratio curves for the cytoplasmic Ca<sup>2+</sup> measurements (B) are representative of 3 independent experiments.

## Supplemental Figure 5.

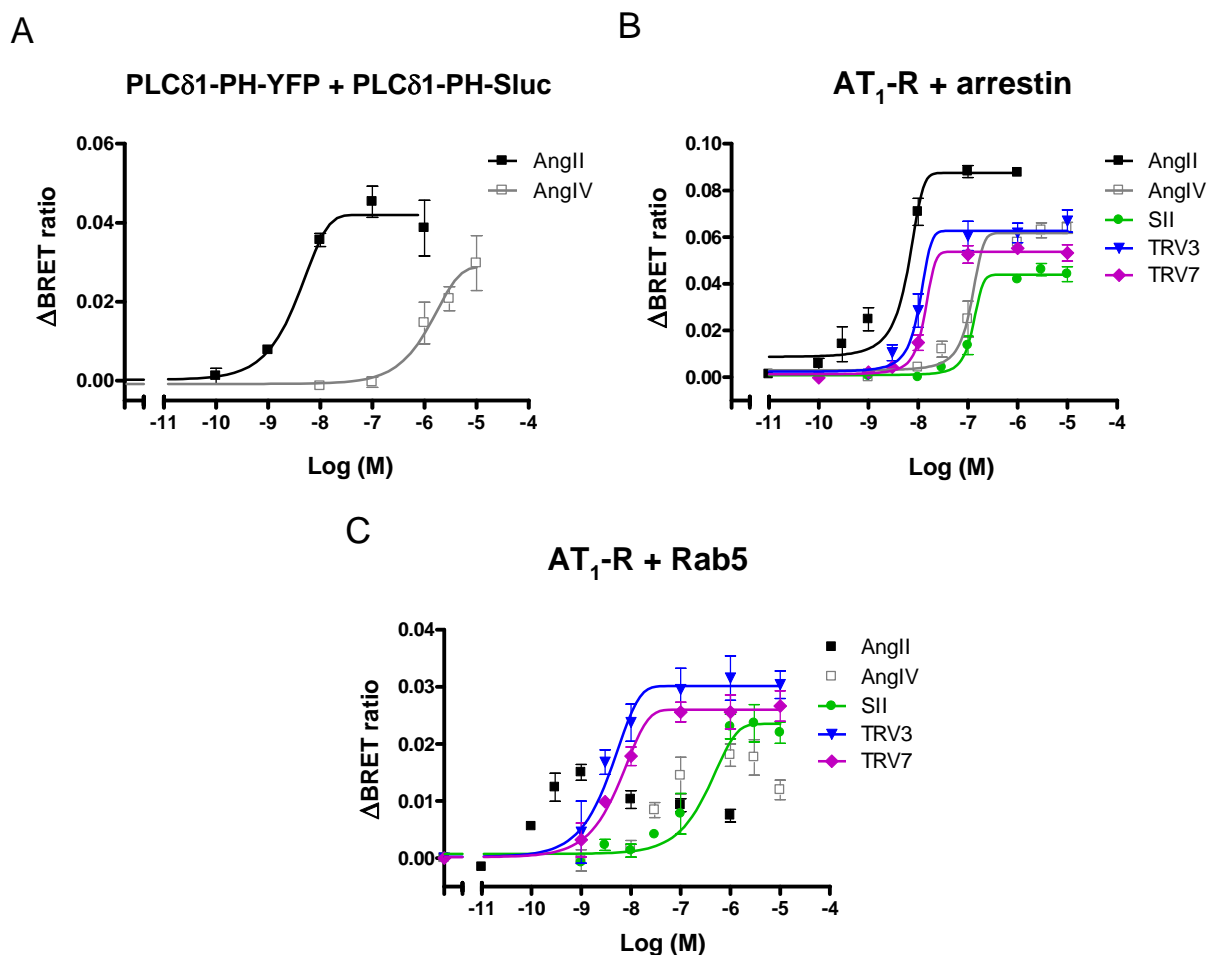

**Supplemental Figure 5. Dose-response curves of AT $_1$ -R induced PtdIns(4,5)P $_2$  hydrolysis (A),  $\beta$ -arrestin2 binding (B), and Rab5 recruitment (C) in HEK293 cells.** HEK293 cells were transfected with the plasmids of the AT $_1$ -R, PLC $\delta$ 1-PH-YFP and PLC $\delta$ 1-PH-Sluc (A), AT $_1$ -R-Rluc and  $\beta$ -arrestin2-YFP (B), AT $_1$ -R-Rluc and Rab5-YFP (C) and after 24 hours the cells were exposed to various concentrations of AngII, AngIV, SII-AngII, TRV120023 (labeled as TRV3), TRV120027 (labeled as TRV7). The BRET records are average of 3 independent experiments, and the following data points were used for the calculations: (A) BRET values in the first minute after stimulation, (B) BRET values between 5-6 minutes after stimulation, (C) BRET values between 9-11 minutes after stimulation. Mean values  $\pm$  SEM are shown (n = 3).

## Supplemental Figure 6.

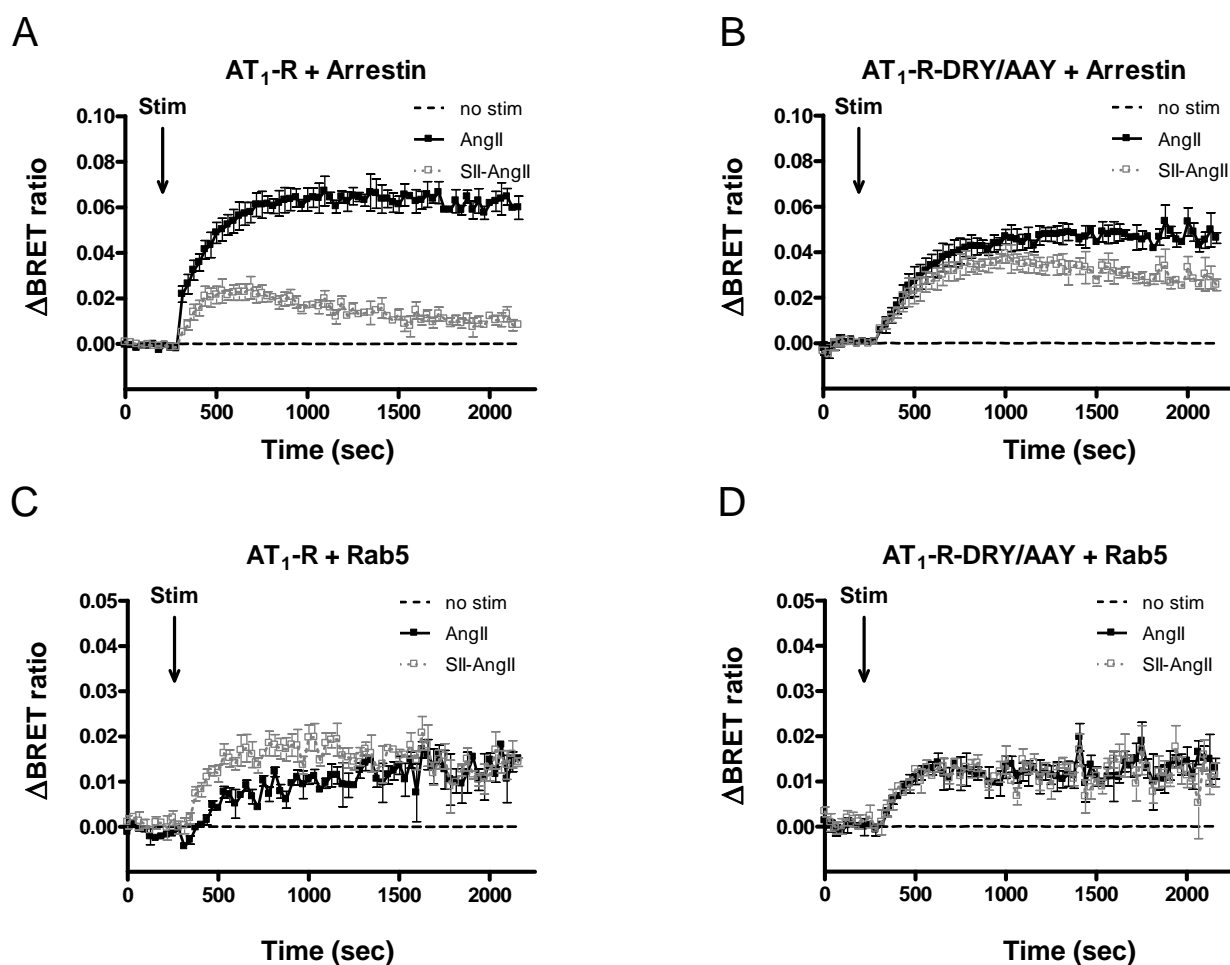

**Supplemental Figure 6. BRET assay between wild type or mutant AT<sub>1</sub>-Rs and  $\beta$ -arrestin2 or Rab5 upon either AngII or SII-AngII stimulation in HEK293 cells.** HEK293 cells were transfected with the plasmids of the indicated receptor-Rluc and with either  $\beta$ -arrestin2-YFP (A-B) or Rab5-YFP (C-D), and after 24 hours the cells were exposed to either vehicle (dashed line) or 100 nM AngII (black filled symbols) or 10  $\mu$ M SII-AngII (grey open symbols) at the indicated time points. BRET pairs: (A) AT<sub>1</sub>-R-Rluc and  $\beta$ -arrestin2-YFP; (B) AT<sub>1</sub>-R-DRY/AAAY-Rluc and  $\beta$ -arrestin2-YFP; (C) AT<sub>1</sub>-R-Rluc and Rab5-YFP; (D) AT<sub>1</sub>-R-DRY/AAAY-Rluc and Rab5-YFP. The BRET records are average of at least 3 independent experiments. Mean values  $\pm$  SEM are shown (n = 3).

## Supplemental Figure 7.

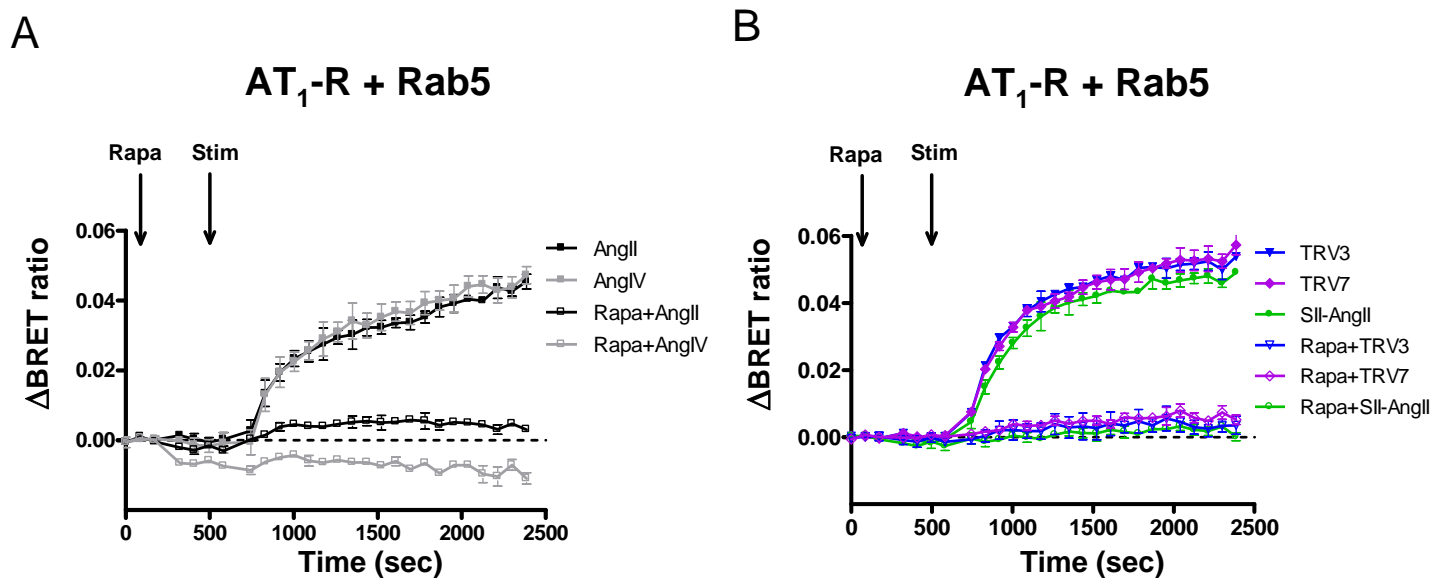

**Supplemental Figure 7. Plasma membrane PtdIns(4,5)P<sub>2</sub> depletion effects AT<sub>1</sub>-R internalization.** HEK293T cells were transfected with plasmids encoding AT<sub>1</sub>-R-Rluc, Venus-Rab5, PM-FRB-mRFP and mRFP-FKBP-5ptase. After 24 hours the cells were pretreated with either rapamycin (300 nM) or vehicle (DMSO) for 5 minutes, followed by stimulation with the indicated agonists (100 nM AngII, 1 μM TRV120023, 1 μM TRV120027, 10 μM SII-AngII or 10 μM AngIV) and (A) Rab5 recruitment and (B) β-arrestin2 binding were detected in BRET measurements.



## Supplemental Figure 8.

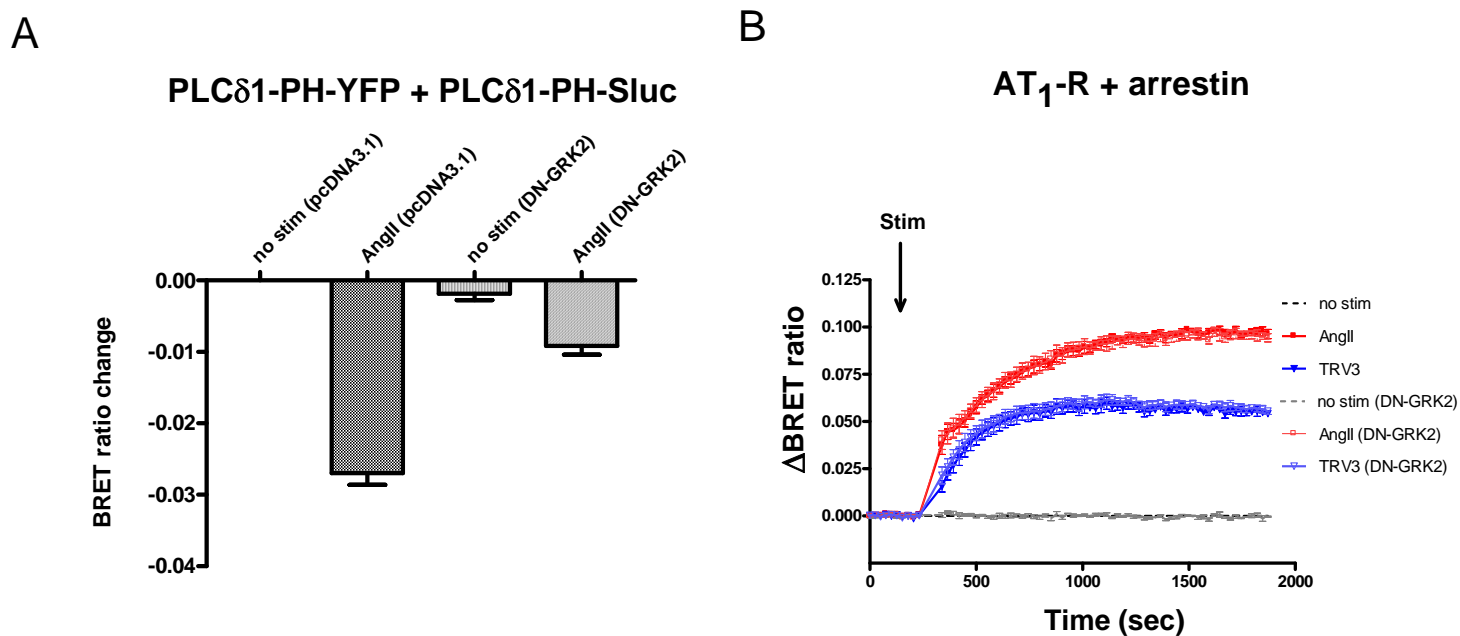

**Supplemental Figure 8. Effects of DN-GRK overexpression on plasma membrane PtdIns(4,5) $P_2$  hydrolysis and  $\beta$ -arrestin2 binding of AT $_1$ -R.** HEK293 cells were transfected with plasmids encoding (A) DN-GRK2, AT $_1$ -R, PLC $\delta$ 1-PH-YFP and PLC $\delta$ 1-PH-Sluc, or (B) DN-GRK2, AT $_1$ -R-Rluc and  $\beta$ -arrestin2-YFP. (A) The cells were exposed to 100 nM AngII and the PtdIns(4,5) $P_2$  hydrolysis caused BRET ratio change was detected for three minutes. (B) The cells were exposed to either 100 nM AngII (red trace), 1  $\mu$ M TRV120023 (labeled as TRV3, blue trace), or vehicle (dashed lines) at the indicated time point. The BRET records are average of 3 independent experiments. Mean values  $\pm$  SEM are shown (n = 3).
